# Supplementary material
Source: ML conference proceedings conference paper supplement (https://openreview.net/forum?id=bpzwUfX1UP)
Supplement: supplementary_material [file attachment]

## 382 A Proof of Proposition 1

383 *Proof.* Assume by induction that  $\mathbf{x}_t^{k+1} = \mathbf{x}_t^*$ . Then

$$\begin{aligned}
 \mathbf{x}_{t+1}^{k+1} &= \mathbf{x}_0^k + \frac{1}{T} \sum_{i=0}^t s(\mathbf{x}_i^k, \frac{i}{T}) \\
 &= [\mathbf{x}_0^k + \frac{1}{T} \sum_{i=0}^{t-1} s(\mathbf{x}_i^k, \frac{i}{T})] + \frac{1}{T} s(\mathbf{x}_t^k, \frac{t}{T}) \\
 &= \mathbf{x}_t^{k+1} + \frac{1}{T} s(\mathbf{x}_t^k, \frac{t}{T}) \\
 &= \mathbf{x}_t^{k+1} + \frac{1}{T} s\left(h_{t-1}(\dots h_2(h_1(\mathbf{x}_0))), \frac{t}{T}\right) \\
 &= \mathbf{x}_t^* + \frac{1}{T} s(\mathbf{x}_t^*, \frac{t}{T}) = \mathbf{x}_{t+1}^*
 \end{aligned}$$

384

□

## 385 B Proof of Proposition 2

386 *Proof.* A linear convergence rate with factor  $\geq 2$  ensures our error from the solution  $\mathbf{x}_t^*$  given by  
 387 sequential sampling at each timestep  $t$  is bounded by the chosen tolerance.

$$\|\mathbf{x}_t^K - \mathbf{x}_t^*\|^2 \leq \lim_{n \rightarrow \infty} \sum_{j=K+1}^n \|\mathbf{x}_t^j - \mathbf{x}_t^{j-1}\|^2 \leq \lim_{n \rightarrow \infty} \sum_{j=K+1}^n \frac{1}{2^{j-K}} \|\mathbf{x}_t^K - \mathbf{x}_t^{K-1}\|^2 \leq \|\mathbf{x}_t^K - \mathbf{x}_t^{K-1}\|^2$$

388 Then, for each timestep  $t$ , since the inference model samples from a Gaussian with variance  $\sigma_t^2$ , we  
 389 can bound the total variation distance.

$$\begin{aligned}
 D_{\text{TV}}(\mathcal{N}(\mathbf{x}_t^K, \sigma_t^2 \mathbf{I}) \parallel \mathcal{N}(\mathbf{x}_t^*, \sigma_t^2 \mathbf{I})) &\leq \sqrt{\frac{1}{2} D_{\text{KL}}(\mathcal{N}(\mathbf{x}_t^K, \sigma_t^2 \mathbf{I}) \parallel \mathcal{N}(\mathbf{x}_t^*, \sigma_t^2 \mathbf{I}))} \\
 &= \sqrt{\frac{\|\mathbf{x}_t^K - \mathbf{x}_t^*\|^2}{4\sigma_t^2}} \leq \sqrt{\frac{\|\mathbf{x}_t^K - \mathbf{x}_t^{K-1}\|^2}{4\sigma_t^2}} \leq \frac{\epsilon}{T}
 \end{aligned}$$

390 Finally, we make use of the data processing inequality, that  $D_{\text{TV}}(f(P) \parallel f(Q)) \leq D_{\text{TV}}(P \parallel Q)$ ,  
 391 so the total variation distance  $d_t$  between the sample and model distribution after  $t$  timesteps does  
 392 not increase when transformed by  $p_\theta$ . Then by the triangle inequality we get that  $d_t \leq d_{t-1} + \epsilon/T$ .  
 393 giving a total variation distance  $d_T$  of at most  $T\epsilon/T = \epsilon$  for the final timestep  $T$ . □

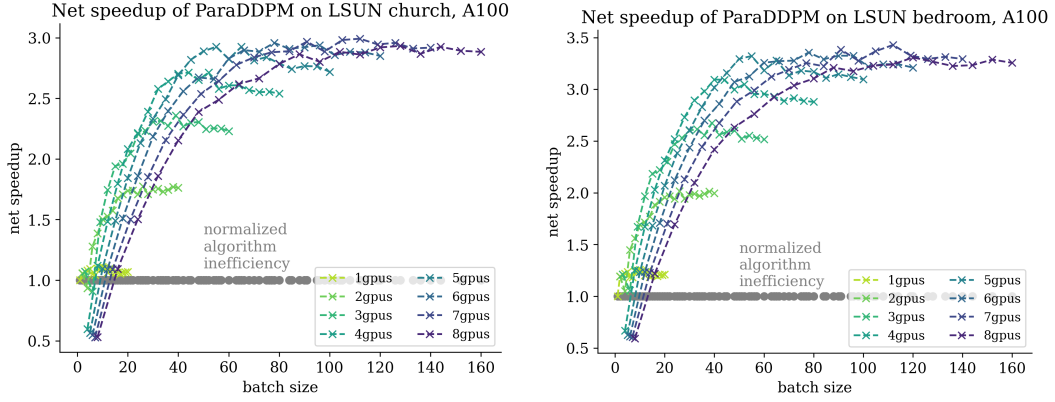

(a) LSUN Church, close to 3x net wall clock speedup with 1000-step ParaDDPM

(b) LSUN Bedroom, over 3x net wall clock speedup with 1000-step ParaDDPM

Figure 5: Unconditional generation of 256x256 images on diffusion models pretrained on the LSUN Church and Bedroom dataset, running ParaDDPM for 1000 steps on A100 GPUs. We plot the net speedup after dividing the hardware efficiency by the algorithm inefficiency as the batch size increases.
